# Supplementary material for: Microwave scattering parameters of ferro–nanocarbon composites for tracking range countermeasures
Source: Royal Society of Chemistry journal article supplement (doi:10.1039/d1ma00977j), 2021-12-18
Supplement: d1ma00977j1.pdf [file d1ma00977j1.pdf]

## Microwave scattering parameters of ferro-nano-carbon-composites for short range tracking countermeasures

Ashwini P. Alegaonkar <sup>a</sup>, Himangshu B. Baskey <sup>b</sup>, Prashant S. Alegaonkar <sup>c, 1</sup>

<sup>a</sup> Department of Chemistry, Savitribai Phule Pune University, Pune 411 007, Maharashtra, India

<sup>b</sup> RF and Microwave Engineering Laboratory, Department of Strategic Materials, DMSRDE-DRDO, GT Road, Kanpur 208013, Uttar Pradesh, India

<sup>c</sup> Department of Physics, School of Basic and Applied Sciences, Central University of Punjab, Bathinda 151 401, Punjab, India

### Supporting information

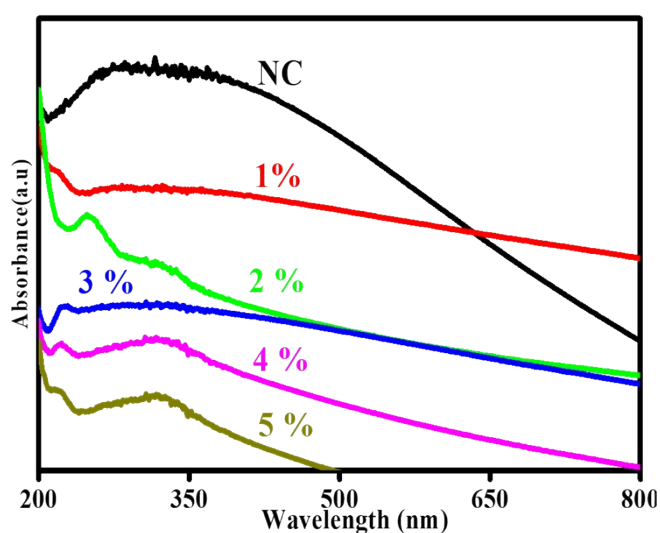

**Figure S1:** UV-visible spectra recorded for aqua dispersed NC and 1-5% FNC in a wavelength regime of 200-800 nm.

**Table S1:** Variations in elemental composition recorded using EDS for NC and 1–5% FNC composites.

| Sample type | C at% | O at% | Ni at% |
|-------------|-------|-------|--------|
| NC          | 99.02 | 00.98 | -      |
| 1           | 80.11 | 27.22 | 00.67  |
| 2           | 42.68 | 49.58 | 05.74  |
| 3           | 47.43 | 38.17 | 14.40  |
| 4           | 54.84 | 26.80 | 20.36  |
| 5           | 35.30 | 40.04 | 24.66  |

<sup>1</sup> Corresponding author: Prashant S. Alegaonkar (e-mail: prashant.alegaonkar@cup.edu.in)

**Table S2:** Relationship between  $S_{ij}$  (in dB) (in terms of shielding effectiveness) and power transmission in (PT) %.

| $S_{ij}$ (in dB) | PT (%) | $S_{ij}$ (in dB) | PT (%) |
|------------------|--------|------------------|--------|
| 0                | 100.00 | 12               | 06.25  |
| 1                | 81.00  | 13               | 05.00  |
| 2                | 62.80  | 14               | 04.00  |
| 3                | 50.00  | 15               | 03.13  |
| 4                | 40.00  | 16               | 02.50  |
| 5                | 31.60  | 17               | 02.00  |
| 6                | 25.00  | 18               | 01.56  |
| 7                | 20.00  | 19               | 01.20  |
| 8                | 16.00  | 20               | 01.00  |
| 9                | 12.50  | 25               | 00.32  |
| 10               | 10.00  | 30               | 00.10  |
| 11               | 07.90  | -                | -      |
